# Supplementary material for: The Origin of Mirror Symmetry in High-Resolution NMR Spectra
Source: Copernicus journal article supplement (doi:10.5194/mr-2025-15), 2025-12-05
Supplement: Supplementary file [file mr-2025-15-AC2-supplement.pdf]

# Mirror Symmetry of the NMR Spectrum and the Connection with the Structure of Spin Hamiltonian Matrix Representations

Dmitry A. Cheshkov and Dmitry O. Sinitsyn

December 27, 2025

## Abstract

This document provides a comprehensive theoretical framework for understanding the symmetry properties of High-Resolution NMR spectra. We analyze the conditions under which a spectrum exhibits mirror symmetry (palindromicity). We demonstrate that such symmetry can arise from two distinct mechanisms: (1) the direct geometric bisymmetry of the Hamiltonian matrix in a generalized canonical basis (typical for balanced systems like  $A_nB_n$  or  $A_nX_n$ ), and (2) a more fundamental property of topological isospectrality (similarity) under parameter exchange induced by the internal symmetry of the spin system, which applies even when the matrix lacks geometric symmetry (as observed in  $AA'BB'$  systems).

## Contents

|          |                                                       |          |
|----------|-------------------------------------------------------|----------|
| <b>1</b> | <b>General Formulas</b>                               | <b>3</b> |
| <b>2</b> | <b>Canonical Basis and Matrix Symmetries</b>          | <b>3</b> |
| 2.1      | Basis Ordering and Structure . . . . .                | 3        |
| 2.2      | Mathematical Definition of the Symmetry . . . . .     | 4        |
| <b>3</b> | <b>Zeeman Interaction: Anti-Persymmetry</b>           | <b>4</b> |
| 3.1      | Matrix Element . . . . .                              | 4        |
| 3.2      | Symmetry Property . . . . .                           | 4        |
| <b>4</b> | <b>Spin-Spin Interaction: Bisymmetry</b>              | <b>4</b> |
| 4.1      | General Matrix Element Formula . . . . .              | 4        |
| 4.2      | Bisymmetry Property . . . . .                         | 5        |
| <b>5</b> | <b>Elementary Spectral Transformations</b>            | <b>5</b> |
| 5.1      | Spectrum Translation via Frequency Offset . . . . .   | 5        |
| 5.1.1    | Hamiltonian Transformation . . . . .                  | 5        |
| 5.1.2    | Shift of Spectral Lines . . . . .                     | 5        |
| 5.2      | Frequency Inversion and Spectral Reflection . . . . . | 5        |
| 5.2.1    | Transformation of the Hamiltonian . . . . .           | 6        |
| 5.2.2    | Inversion of Selection Rules . . . . .                | 6        |
| 5.2.3    | Reflection of Fine Structure . . . . .                | 6        |
| 5.3      | Frequency Inversion and Magnet Reversal . . . . .     | 6        |

|           |                                                                                      |           |
|-----------|--------------------------------------------------------------------------------------|-----------|
| <b>6</b>  | <b>Spectral Symmetry: The Ideal Case (<math>[\hat{H}, \hat{Q}] = 0</math>)</b>       | <b>7</b>  |
| 6.1       | The Conflict of Symmetries . . . . .                                                 | 7         |
| 6.2       | Restoration via Generalized Parity . . . . .                                         | 7         |
| 6.3       | Connection: Why Commutation Implies Symmetry . . . . .                               | 7         |
| 6.3.1     | The Indistinguishability Argument . . . . .                                          | 7         |
| 6.4       | The Generalized Canonical Basis ( $\hat{Q}$ -basis) . . . . .                        | 7         |
| 6.4.1     | Mechanism of Symmetrization (Example) . . . . .                                      | 7         |
| 6.4.2     | Structure and Symmetry of the Zero-Quantum Block ( $M_z = 0$ ) . . . .               | 8         |
| 6.5       | Rigorous Mathematical Proofs . . . . .                                               | 8         |
| 6.5.1     | Proof via Unitary Transformation . . . . .                                           | 8         |
| 6.5.2     | Proof via Method of Moments . . . . .                                                | 9         |
| 6.6       | Generalized Symmetry (Reflect and Shift) . . . . .                                   | 9         |
| <b>7</b>  | <b>Beyond Geometric Symmetry: The Case of <math>AA'BB'</math> and Isospectrality</b> | <b>9</b>  |
| 7.1       | Broken Bisymmetry . . . . .                                                          | 9         |
| 7.2       | Symmetry via Isospectrality . . . . .                                                | 9         |
| 7.3       | The Mechanism of Internal Symmetry . . . . .                                         | 10        |
| 7.3.1     | Symmetrized Basis Construction . . . . .                                             | 10        |
| 7.3.2     | Emergence of Balanced Parameters . . . . .                                           | 10        |
| 7.4       | Algebraic Condition: Commutation vs. Anti-Commutation . . . . .                      | 10        |
| 7.4.1     | The Symmetric Block: Commutation and Matrix Geometry . . . . .                       | 10        |
| 7.4.2     | The Antisymmetric Block: Anti-Commutation and Matrix Geometry                        | 11        |
| 7.5       | Summary: The Four Pillars of Symmetry Analysis . . . . .                             | 12        |
| 7.6       | Comparison with Magnetic Equivalence ( $A_nB_n$ and $A_2X_2$ ) . . . . .             | 13        |
| <b>8</b>  | <b>The General Theorem of Spectral Symmetry</b>                                      | <b>13</b> |
| <b>9</b>  | <b>Practical Criterion for Spectral Symmetry</b>                                     | <b>13</b> |
| 9.1       | Condition 1: Frequency Centrosymmetry . . . . .                                      | 14        |
| 9.2       | Condition 2: Symmetry of the $J$ -Coupling Matrix . . . . .                          | 14        |
| <b>10</b> | <b>Implications for Structure Elucidation (The Inverse Problem)</b>                  | <b>15</b> |
| <b>11</b> | <b>Conclusion</b>                                                                    | <b>15</b> |

# 1 General Formulas

The Hamiltonian of a nuclear spin system in a strong magnetic field (high-resolution NMR) is represented as the sum of the Zeeman interaction and spin-spin interactions:

$$\hat{H} = \hat{H}_Z + \hat{H}_{SS} = \hat{H}_Z + (\hat{H}_J + \hat{H}_D) \quad (1)$$

Where the components are defined as follows:

- **Zeeman Interaction ( $\hat{H}_Z$ ):** Interaction of spins with the external magnetic field  $B_0$ .

$$\hat{H}_Z = \sum_{i=1}^n \nu_i \hat{I}_{iz} \quad (2)$$

Here  $\nu_i$  is the resonance frequency of the  $i$ -th nucleus, and  $\hat{I}_{iz}$  is the operator of the z-component of the spin angular momentum.

- **Spin-Spin Interaction ( $\hat{H}_{SS}$ ):** The sum of isotropic scalar ( $J$ ) and secular dipolar ( $D$ ) contributions. In the secular approximation (high field), only the terms commuting with total  $I_z$  are retained:

$$\hat{H}_{SS} = \sum_{i<j} J_{ij} (\hat{I}_i \cdot \hat{I}_j) + \sum_{i<j} d_{ij} (3\hat{I}_{iz}\hat{I}_{jz} - \hat{I}_i \cdot \hat{I}_j) \quad (3)$$

where  $J_{ij}$  is the scalar coupling constant and  $d_{ij}$  is the residual dipolar coupling constant (if present).

## 2 Canonical Basis and Matrix Symmetries

It is important to distinguish between the symmetry of a specific spin system and the general symmetry properties of the Hamiltonian matrix representation. In this section, we define the **Canonical Basis** – a general-purpose basis applicable to any spin system. We then demonstrate that in this basis, the Hamiltonian matrices possess inherent symmetries (persymmetry and bisymmetry) that stem solely from the algebra of spin operators. For the matrix representation, we employ the basis of simple products of single-spin functions (*Product functions basis*). Each state  $|\psi_k\rangle$  of a system of  $N$  spins (where  $I = 1/2$ ) is defined by the set of magnetic quantum numbers  $m_i = \pm 1/2$ :

$$|\psi_k\rangle = |m_1^{(k)}, m_2^{(k)}, \dots, m_N^{(k)}\rangle \quad (4)$$

### 2.1 Basis Ordering and Structure

The basis functions are ordered to satisfy two fundamental conditions simultaneously:

1.  **$M_z$ -Sorting:** The states are arranged by the descending value of the total spin projection  $M_z = \sum m_i$ . This ensures that the Hamiltonian matrix has a block-diagonal structure.
2. **Spin-Inversion Centrosymmetry:** Within the  $M_z$  ordering, the sequence is chosen such that the entire basis is centrosymmetric with respect to the global spin inversion operator  $\hat{P}$  (where  $\hat{P}$  flips all spins  $m_i \rightarrow -m_i$ ).

## 2.2 Mathematical Definition of the Symmetry

This centrosymmetric property implies a rigorous mapping between the physical operation of spin inversion and the index numbers of the basis functions. If the dimension of the Hilbert space is  $D = 2^N$ , then for any  $k$ -th basis function:

$$\hat{P}|\psi_k\rangle = |\psi_{D+1-k}\rangle \quad (5)$$

This relationship links the algebraic properties of the spin operators directly to the persymmetry (symmetry with respect to the anti-diagonal) of the Hamiltonian matrix.

## 3 Zeeman Interaction: Anti-Persymmetry

In the product basis, the operator  $\hat{H}_Z$  is strictly diagonal since the basis functions are eigenfunctions of  $\hat{I}_{iz}$ .

### 3.1 Matrix Element

The energy of state  $|\mathbf{a}\rangle$  is the sum of resonance frequencies weighted by spin projections:

$$\langle \mathbf{a} | \hat{H}_Z | \mathbf{a} \rangle = \sum_{i=1}^N \nu_i m_i^{(a)} \quad (6)$$

### 3.2 Symmetry Property

Applying the inversion operator  $\hat{P}$  flips all signs  $m_i \rightarrow -m_i$ , reversing the sign of the total Zeeman energy. Due to the centrosymmetric basis property ( $k \leftrightarrow D+1-k$ ), this implies that the Zeeman matrix is antisymmetric with respect to the anti-diagonal (anti-persymmetric):

$$(H_Z)_{ii} = -(H_Z)_{D+1-i, D+1-i} \quad (7)$$

## 4 Spin-Spin Interaction: Bisymmetry

### 4.1 General Matrix Element Formula

The full matrix element between states  $|\mathbf{a}\rangle$  and  $|\mathbf{b}\rangle$  is given by explicitly summing over all pairs:

$$\langle \mathbf{a} | \hat{H}_{SS} | \mathbf{b} \rangle = \sum_{k < l}^N \left[ \underbrace{\delta_{\mathbf{a}, \mathbf{b}} (J_{kl} + 2d_{kl}) m_k^{(a)} m_l^{(a)}}_{\text{Diagonal}} + \underbrace{\frac{1}{2} (J_{kl} - d_{kl}) \hat{\Delta}_{kl}^{(\mathbf{a}, \mathbf{b})}}_{\text{Off-diagonal}} \right] \quad (8)$$

Where the auxiliary symbols are defined as follows:

- $\delta_{\mathbf{a}, \mathbf{b}}$  (**Small Delta**) is the Kronecker delta, which selects the diagonal elements:

$$\delta_{\mathbf{a}, \mathbf{b}} = \begin{cases} 1, & \text{if } |\mathbf{a}\rangle = |\mathbf{b}\rangle \\ 0, & \text{if } |\mathbf{a}\rangle \neq |\mathbf{b}\rangle \end{cases} \quad (9)$$

- $\hat{\Delta}_{kl}^{(\mathbf{a},\mathbf{b})}$  (**Large Delta**) is the selection filter for flip-flop transitions. It equals 1 if and only if the states differ exactly by the exchange of spins  $k$  and  $l$  (where  $m_k \neq m_l$ ):

$$\hat{\Delta}_{kl}^{(\mathbf{a},\mathbf{b})} = \begin{cases} 1, & \text{if } |\mathbf{b}\rangle \in \{\hat{I}_k^+ \hat{I}_l^- |\mathbf{a}\rangle, \hat{I}_k^- \hat{I}_l^+ |\mathbf{a}\rangle\} \\ 0, & \text{otherwise} \end{cases} \quad (10)$$

*Note:* While the secular Hamiltonian includes both scalar ( $J$ ) and residual dipolar ( $d$ ) couplings with different coefficients (see Eq. 8), both tensors share the same spatial symmetry properties defined by the molecular geometry. For brevity, in the subsequent symmetry analysis, we will refer to the generalized coupling matrix simply as the  **$J$ -coupling matrix**, implying that it effectively incorporates all spatial interaction constants.

## 4.2 Bisymmetry Property

The value of the spin-spin interaction matrix element is **invariant** under global spin inversion  $\hat{P}$ :

$$\langle \mathbf{a} | \hat{P}^\dagger \hat{H}_{SS} \hat{P} | \mathbf{b} \rangle = \langle \mathbf{a} | \hat{H}_{SS} | \mathbf{b} \rangle \quad (11)$$

**Conclusion:** The  $\hat{H}_{SS}$  matrix is symmetric with respect to both the main diagonal (Hermitian) and the anti-diagonal (persymmetric), making it a **bisymmetric matrix**. This property is universal.

## 5 Elementary Spectral Transformations

### 5.1 Spectrum Translation via Frequency Offset

In experimental NMR, changing the transmitter offset corresponds to a rigid translation of the spectrum.

#### 5.1.1 Hamiltonian Transformation

Adding a constant offset  $\Omega$  to all resonance frequencies ( $\nu_i \rightarrow \nu_i + \Omega$ ) modifies the Hamiltonian:

$$\hat{H}' = \hat{H} + \Omega \hat{I}_z^{tot} \quad (12)$$

Since  $[\hat{H}, \hat{I}_z^{tot}] = 0$  in the secular approximation, the eigenstates remain unchanged, but the energy eigenvalues are shifted linearly:  $E'_n = E_n + \Omega M_z^{(n)}$ .

#### 5.1.2 Shift of Spectral Lines

For observable single-quantum transitions ( $\Delta M_z = -1$ ), the frequency shift is:

$$\omega'_{mn} = (E'_m - E'_n) = (E_m - E_n) + \Omega(M_z^{(m)} - M_z^{(n)}) = \omega_{mn} - \Omega \quad (13)$$

Since the shift is identical for all lines, the internal multiplet structure (determined by  $J$ -couplings) remains invariant. Thus, the offset operation performs a pure translation of the spectral pattern.

### 5.2 Frequency Inversion and Spectral Reflection

It is a fundamental property that inverting the signs of all resonance frequencies leads to a mirror reflection of the spectrum. This reflection applies not only to the positions of the multiplets but also to their internal fine structure.

### 5.2.1 Transformation of the Hamiltonian

Let  $\hat{H}'$  be the Hamiltonian where all resonance frequencies are inverted ( $\nu_i \rightarrow -\nu_i$ ). This is equivalent to:

$$\hat{H}' = -\hat{H}_Z + \hat{H}_{SS} \quad (14)$$

Applying the spin inversion operator  $\hat{P}$ :

$$\hat{P}^\dagger \hat{H}' \hat{P} = -(-\hat{H}_Z) + \hat{H}_{SS} = \hat{H}_{original} \quad (15)$$

Thus,  $\hat{H}'$  and  $\hat{H}_{original}$  are unitarily similar and share the **same set of energy eigenvalues**. This implies that the set of energy intervals (which define the magnitude of  $J$ -coupling splittings) remains numerically invariant.

### 5.2.2 Inversion of Selection Rules

Although the energy levels are the same, the observable transitions change due to the transformation of the eigenstates:  $|\tilde{n}\rangle = \hat{P}|n\rangle$ . The observable signal depends on the transition matrix elements of the lowering operator  $\hat{I}^-$ . The operator  $\hat{P}$  transforms the lowering operator into the raising operator:

$$\hat{P}^\dagger \hat{I}^- \hat{P} = -\hat{I}^+ \quad (16)$$

Consequently, a transition allowed in the original system at frequency  $\omega = E_f - E_i$  corresponds to a transition in the inverted system associated with the reverse process ( $\Delta M = +1$ ), appearing at frequency  $-\omega$ .

### 5.2.3 Reflection of Fine Structure

Crucially, this mechanism reflects the **entire topology** of the spectrum. One might intuitively expect that since the scalar couplings  $J_{ij}$  are not inverted, the multiplets would simply shift positions while retaining their original shape. However, the unitary transformation  $\hat{P}$  affects the mixing coefficients of the wavefunctions. As a result:

- The center of the multiplet moves from  $\nu$  to  $-\nu$ .
- The internal structure is mirrored: a transition that was on the "right" side of the multiplet (e.g.,  $\nu + J/2$ ) maps to the "left" side relative to the new center ( $-\nu - J/2$ ).
- Intensity distortions, such as the "roof effect" (where inner lines are stronger), are also strictly reflected.

Thus,  $\hat{H}'(-\nu)$  generates a spectrum  $S(-\omega)$  which is a perfect mirror image of  $S(\omega)$  down to the finest detail.

## 5.3 Frequency Inversion and Magnet Reversal

Consider the transformation where all resonance frequencies are inverted ( $\nu_i \rightarrow -\nu_i$ ), which is mathematically equivalent to  $\hat{H}' = -\hat{H}_Z + \hat{H}_{SS}$ . Physically, this corresponds to reversing the external magnetic field ( $B_0 \rightarrow -B_0$ ).

- **Eigenvalues:**  $\hat{H}'$  is unitarily equivalent to  $\hat{H}$  via the spin inversion operator  $\hat{P}$ , so they share the same set of eigenvalues.
- **Selection Rules:**  $\hat{P}$  transforms the lowering operator  $\hat{I}^-$  into  $\hat{I}^+$ , effectively reversing the "direction" of transitions ( $|n\rangle \rightarrow |m\rangle$  becomes  $|\tilde{m}\rangle \rightarrow |\tilde{n}\rangle$ ).

**Conclusion:** The spectrum in a negative field is the mirror image of the spectrum in a positive field:  $S(\omega) \rightarrow S(-\omega)$ .

## 6 Spectral Symmetry: The Ideal Case ( $[\hat{H}, \hat{Q}] = 0$ )

### 6.1 The Conflict of Symmetries

The total Hamiltonian  $\hat{H} = \hat{H}_Z + \hat{H}_{SS}$  generally yields an asymmetric spectrum because its components transform differently under  $\hat{P}$ :  $\hat{H}_Z$  is anti-symmetric, while  $\hat{H}_{SS}$  is symmetric.

### 6.2 Restoration via Generalized Parity

Symmetry is restored if the "asymmetry" of the Zeeman term is compensated by the structural symmetry of the parameters. We introduce the **Generalized Parity Operator**  $\hat{Q} = \hat{P} \times \hat{\Pi}$ , where  $\hat{\Pi}$  is the spatial permutation of nuclei ( $i \leftrightarrow N + 1 - i$ ). The fundamental algebraic condition for symmetry is  $[\hat{H}, \hat{Q}] = 0$ .

### 6.3 Connection: Why Commutation Implies Symmetry

Why does the algebraic condition  $[\hat{H}, \hat{Q}] = 0$  force the spectrum to be a palindrome?

#### 6.3.1 The Indistinguishability Argument

1. **Magnet Reversal Effect:** Changing the sign of the magnetic field reflects the spectrum:  $S(\omega) \rightarrow S(-\omega)$  (Section 5.3).
2. **Structural Symmetry:** If the system parameters satisfy the conditions for  $[\hat{H}, \hat{Q}] = 0$ , then the state of the system in a reversed field ( $-\nu$ ) is structurally identical to the original state ( $\nu$ ), differing only by the labeling of the nuclei (operator  $\hat{\Pi}$ ).
3. **Conclusion:** Since the physics is invariant under relabeling, the spectrum of the "reversed magnet" system must be identical to the spectrum of the "original" system:

$$S(-\omega) = S(\omega) \quad (17)$$

The commutation relation  $[\hat{H}, \hat{Q}] = 0$  is the rigorous operator statement that the system is invariant under the combined operation of field inversion and relabeling.

### 6.4 The Generalized Canonical Basis ( $\hat{Q}$ -basis)

To make the spectral symmetry manifest in the matrix form, we introduce a reordered basis adapted to the combined operator  $\hat{Q}$ . In this basis, the pairing of states is defined by the generalized parity operator  $\hat{Q} = \hat{P}\hat{\Pi}$ .

**Mechanism of Restoration** In a centered spectrum ( $\sum \nu_i = 0$ ), the resonance frequencies obey  $\nu_k = -\nu_{N+1-k}$ . Since the paired states in this basis are structural mirror images of each other, every spin contribution  $+\nu_i$  in one state is perfectly compensated by a contribution  $-\nu_i$  in its partner.

#### 6.4.1 Mechanism of Symmetrization (Example)

Consider a 3-spin system. The state  $|+--\rangle$  ( $m_1 = +, m_2 = -, m_3 = -$ ) transforms into its symmetric partner as follows:

$$|+--\rangle \xrightarrow{\hat{\Pi}} |--+\rangle \xrightarrow{\hat{P}} |++-\rangle$$

This combined operation guarantees that if the resonance frequencies are antisymmetric relative to the center, the paired states possess identical Zeeman energies ( $E = E'$ ). This transforms the Zeeman matrix for these **Shell** states from anti-persymmetric to **persymmetric**, matching the symmetry of the spin-spin interaction.

#### 6.4.2 Structure and Symmetry of the Zero-Quantum Block ( $M_z = 0$ )

For subspaces with  $M_z \neq 0$ , the operator  $\hat{Q}$  simply maps the entire block  $+M$  to the block  $-M$ . However, in systems with an even number of spins ( $N \geq 2$ ), the Zero-Quantum subspace ( $M_z = 0$ ) is mapped onto itself. It is only within this block that **self-conjugate states** (states invariant under  $\hat{Q}$ ) can arise. To manage this complexity, the basis is organized into a **Nested "Shell-Core" Structure**, which leads to a specific hybrid symmetry of the Zeeman interaction.

1. **The Shell (Transverse Pairs):** States that are *not* invariant under  $\hat{Q}$  form pairs  $|\psi_a\rangle \leftrightarrow |\psi_b\rangle$ .
  - *Symmetry Implication:* As a consequence of the restoration mechanism described above, the total Zeeman energies of the pair are strictly equal ( $E_a = E_b$ ). This equality transforms the Zeeman matrix relation from anti-persymmetry ( $H_{ij} = -H_{ji}$ ) to **persymmetry** ( $H_{ij} = H_{ji}$ ), resolving the conflict with the symmetric  $J$ -coupling term.
2. **The Core (Self-Conjugate States):** States that are invariant under  $\hat{Q}$  lie in the exact center of the basis ( $M_z = 0$ ). They are mapped onto themselves (or within the small core block) by  $\hat{Q}$ , meaning they lack a distinct "frequency-compensating" partner.
  - *Mechanism of Persistence:* For these states, the pairing is defined solely by spin inversion  $\hat{P}$ , which reverses all spins without swapping nuclei. This operation simply flips the sign of the total energy:  $E \rightarrow -E$ .
  - *Symmetry Implication:* Since there is no partner with equal energy to restore balance, the condition  $E_i = -E_j$  persists. Therefore, the Zeeman matrix in the "Core" region remains **anti-persymmetric**, preventing the total Hamiltonian from becoming globally bisymmetric.
  - *Algebraic Consistency:* Crucially, this violation of geometric bisymmetry does not imply a breakdown of the fundamental commutation relation  $[\hat{H}, \hat{Q}] = 0$  (for balanced systems). The apparent conflict is an artifact of the matrix representation: for self-conjugate states,  $\hat{Q}$  acts via spin inversion  $\hat{P}$  (flipping Zeeman energy signs) rather than by swapping degenerate partners. Thus, algebraic symmetry is preserved despite the hybrid geometric structure.

**Conclusion:** The total Zeeman matrix in the  $\hat{Q}$ -basis possesses a **hybrid symmetry**: it is persymmetric in the outer shell but anti-persymmetric in the inner core. This hybrid nature prevents the total Hamiltonian  $\hat{H} = \hat{H}_Z + \hat{H}_{SS}$  from being globally bisymmetric, even if  $\hat{H}_{SS}$  is perfect.

## 6.5 Rigorous Mathematical Proofs

### 6.5.1 Proof via Unitary Transformation

The NMR spectrum  $S(\omega)$  is the Fourier transform of the correlation function. Applying the unitary transformation  $\hat{Q}$  to the trace (noting that  $\hat{Q}^\dagger \hat{I}_x \hat{Q} = -\hat{I}_x$  and the trace is invariant

under unitary similarity  $\text{Tr}(A) = \text{Tr}(\hat{Q}^\dagger A \hat{Q})$ :

$$\text{Corr}'(t) = \text{Tr} \left( e^{-i\hat{H}t} (-\hat{I}_x) e^{i\hat{H}t} (-\hat{I}_x) \right) = \text{Corr}(t) \quad (18)$$

Since  $\hat{Q}$  involves spin inversion, it effectively maps  $S(\omega) \rightarrow S(-\omega)$ . If the correlation function is invariant, the spectrum is symmetric.

### 6.5.2 Proof via Method of Moments

The symmetry can also be proven by showing that all odd Van Vleck moments vanish. The  $n$ -th moment  $M_n$  is defined as:

$$M_n = \int_{-\infty}^{\infty} \omega^n I(\omega) d\omega \propto \text{Tr} \{ [\hat{H}, [\hat{H}, \dots [\hat{H}, \hat{I}_x] \dots]] \hat{I}_x \} \quad (19)$$

Applying the transformation  $\hat{P}$  maps  $\hat{H} \rightarrow \hat{H}'(-\nu)$ . Since the spectrum of the inverted system is the mirror image of the original,  $I(\omega) = I(-\omega)$ . Consequently, all odd moments  $M_1, M_3, \dots$  must be identically zero.

## 6.6 Generalized Symmetry (Reflect and Shift)

If the system possesses structural symmetry ( $J_{ij}$  are centrosymmetric) but the transmitter offset is not set to zero (i.e.,  $\nu_i \neq -\nu_{N+1-i}$ ), the spectrum is still a palindrome, but centered at  $\omega_0 \neq 0$ . The generalized symmetry condition is:

$$S(2\omega_0 - \omega) = S(\omega) \quad (20)$$

This implies that the mirror image of the spectrum can be superimposed onto the original spectrum by a rigid linear translation.

## 7 Beyond Geometric Symmetry: The Case of $AA'BB'$ and Isospectrality

While the condition  $[\hat{H}, \hat{Q}] = 0$  implies strict bisymmetry of the matrix (as seen in  $A_n B_n$  or  $A_n X_n$ ), recent analysis of  $AA'BB'$  systems reveals a more general mechanism.

### 7.1 Broken Bisymmetry

In systems like ortho-dichlorobenzene ( $AA'BB'$ ), the intragroup coupling constants  $J_{AA'}$  and  $J_{BB'}$  are not equal. This inequality means that formally  $[\hat{H}, \hat{Q}] \neq 0$ , and the Hamiltonian matrix is **not bisymmetric** even in the generalized basis.

### 7.2 Symmetry via Isospectrality

Despite the lack of matrix symmetry, the spectrum remains a palindrome. This is because the system is **isospectral** under the physical parameter exchange induced by field inversion. In a reference frame centered at  $\nu_0$ , the resonance frequencies of the A and B groups are related by mirror reflection:  $\nu_A = 2\nu_0 - \nu_B$ . Therefore, the operation of spectral reflection ( $\nu \rightarrow 2\nu_0 - \nu$ ) physically corresponds to swapping the resonance frequencies  $\nu_A \leftrightarrow \nu_B$ .

### 7.3 The Mechanism of Internal Symmetry

The existence of spectral symmetry in this case is not accidental; it is a direct consequence of the internal symmetry of the spin system ( $C_2$  point group). Because the nuclei  $A$  and  $A'$  are chemically equivalent (as are  $B$  and  $B'$ ), the Hamiltonian commutes with the local permutation operators. To illustrate this mechanism, we consider the explicit matrix representation derived from the  $C_2$  group symmetry.

#### 7.3.1 Symmetrized Basis Construction

Using the permutation symmetry  $A \leftrightarrow A'$  and  $B \leftrightarrow B'$ , the basis functions can be adapted to the irreducible representations of the point group. Based on the unitary transformations derived from group theory, the states are grouped as symmetric ( $s$ ) and antisymmetric ( $a$ ) combinations. Consequently, the entire Hamiltonian matrix factorizes into independent blocks corresponding to the irreducible representations. The transformed Hamiltonian  $\hat{H}' = \hat{U}^\dagger \hat{H} \hat{U}$  takes the general block-diagonal form:

$$\hat{H}' = \begin{pmatrix} \mathbf{H}_{sym} & \mathbf{0} \\ \mathbf{0} & \mathbf{H}_{anti} \end{pmatrix} \quad (21)$$

For the specific case of the  $M = 0$  subspace (dimension 6) in the  $AA'BB'$  system, this results in a  $4 \times 4$  symmetric block and a  $2 \times 2$  antisymmetric block.

#### 7.3.2 Emergence of Balanced Parameters

The explicit calculation of the matrix elements reveals that the off-diagonal coupling terms appear exclusively as sums and differences. Crucially, these parameters are strictly segregated by symmetry:

- **Symmetric Block ( $\mathbf{H}_{sym}$ ):** Contains only the sums of coupling constants, such as  $(J_{AA'} + J_{BB'})$  and  $(J_{AB} + J_{AB'})$ .
- **Antisymmetric Block ( $\mathbf{H}_{anti}$ ):** Contains only the differences, such as  $(J_{AA'} - J_{BB'})$  and  $(J_{AB} - J_{AB'})$ .

### 7.4 Algebraic Condition: Commutation vs. Anti-Commutation

The distinct geometric behaviors of the symmetric and antisymmetric blocks can be rigorously explained using the algebra of commutators with the generalized parity operator  $\hat{Q}$ .

#### 7.4.1 The Symmetric Block: Commutation and Matrix Geometry

**Algebraic Invariance and Commutation** The Hamiltonian block restricted to the symmetric subspace,  $\mathbf{H}_{sym}$ , depends on the spin-spin interaction parameters exclusively via their sums (e.g.,  $J_{AB} + J_{A'B'}$ ). Since the action of the generalized parity operator  $\hat{Q}$  involves the permutation of nuclei that swaps these parameters ( $J \leftrightarrow J'$ ), the sums remain invariant. Furthermore, the Zeeman interaction (for a centered spectrum) is also invariant under the combined operation of field inversion and nuclear permutation (as shown in Section 6.3). Consequently, the \*\*entire symmetric block commutes\*\* with the operator  $\hat{Q}$ :

$$[\mathbf{H}_{sym}, \hat{Q}] = 0$$

This algebraic invariance is the fundamental reason for the spectral symmetry associated with this block.

**Geometric Symmetry of Matrix Representations** Despite the global commutation with  $\hat{Q}$ , the geometric symmetry of the Hamiltonian matrix (specifically, its behavior under reflection about the secondary diagonal, which corresponds to the operator  $\hat{P}$ ) exhibits a complex "hybrid" structure due to the properties of the basis:

- **Spin-Spin Interaction ( $\mathbf{H}_J$ ):** This component is strictly **bisymmetric** (persymmetric and centrosymmetric), as the parameter sums are invariant under the spatial reflection of the matrix.
- **Zeeman Interaction ( $\mathbf{H}_Z$ ):**
  - In the **Shell** region ( $M \neq 0$ ), the Zeeman matrix is **persymmetric** (due to frequency compensation in pairs).
  - In the **Core** region ( $M = 0$ ), the Zeeman matrix is **anti-persymmetric** (due to the self-conjugate nature of states and anti-commutation with  $\hat{P}$ ).

**Conclusion:** While the block algebraically commutes with  $\hat{Q}$ , its matrix representation is **not globally bisymmetric**. The violation of geometric symmetry in the Core (anti-persymmetric  $H_Z$  vs. symmetric  $H_J$ ) does not destroy spectral symmetry because the over-arching condition  $[\mathbf{H}_{sym}, \hat{Q}] = 0$  holds.

#### 7.4.2 The Antisymmetric Block: Anti-Commutation and Matrix Geometry

**Algebraic Anti-Commutation** The antisymmetric block  $\mathbf{H}_{anti}$  presents a fundamentally different algebraic case. Its matrix elements depend linearly on the parameter differences (e.g.,  $\Delta J = J_{AB} - J_{A'B'}$ ).

- **Operator Anti-Commutation:** Since the permutation  $\hat{\Pi}$  (part of  $\hat{Q}$ ) swaps interaction constants ( $J \leftrightarrow J'$ ), it inverts the sign of the differences:  $\Delta J \rightarrow -\Delta J$ . Consequently, the entire antisymmetric Hamiltonian **anti-commutes** with the generalized parity operator, which is algebraically equivalent to negating the matrix under the unitary transformation  $\hat{Q}$ :

$$\{\mathbf{H}_{anti}, \hat{Q}\} = 0 \implies \hat{Q}^{-1} \mathbf{H}_{anti} \hat{Q} = -\mathbf{H}_{anti} \quad (22)$$

- **Matrix Consequence (Topological Reflection):** The action of the operator  $\hat{Q}$  on the matrix representation is twofold: it reverses the basis order (acting as a mirror) and permutes parameters. Specifically,  $\hat{Q}$  induces a **reflection of the antisymmetric block relative to the secondary diagonal**. In conjunction with the sign inversion from  $\hat{\Pi}$ , this satisfies the anti-commutation relation.
- **Isospectrality Mechanism:** Despite the Hamiltonian changing sign ( $\mathbf{H} \rightarrow -\mathbf{H}$ ), the observable spectrum remains invariant because the characteristic polynomial depends only on even powers of the matrix elements. Algebraically, while the Hamiltonian anti-commutes, its square **commutes**:

$$[\mathbf{H}_{anti}^2, \hat{Q}] = 0 \quad (23)$$

This ensures that the set of energy eigenvalues (squared energies) is preserved, guaranteeing spectral symmetry despite the lack of geometric matrix symmetry.

**Geometric Symmetry of Matrix Representations** Unlike the symmetric block, the matrix representation of the antisymmetric subspace does not possess a static geometric symmetry (such as bisymmetry).

- **Spin-Spin Interaction ( $\mathbf{H}_J$ ):** The matrix elements depend on the *differences* of coupling constants (e.g.,  $J_{AA'} - J_{BB'}$ ). Since the geometric reflection of the matrix (swapping indices  $i \leftrightarrow N + 1 - i$ ) effectively corresponds to the parameter exchange  $J \leftrightarrow J'$ , it inverts the sign of these elements. Consequently, the  $J$ -coupling matrix is **anti-persymmetric** rather than bisymmetric.
- **The Core Mechanism ( $M = 0$ ):** In the Core region, this anti-reflection manifests as a specific topological requirement: the diagonal elements (which depend on cross-coupling differences) must swap positions upon reflection, while off-diagonal elements change signs. This lack of static symmetry is precisely what allows the block to satisfy the condition  $\{\mathbf{H}_{anti}, \hat{Q}\} = 0$ .

## 7.5 Summary: The Four Pillars of Symmetry Analysis

Our analysis confirms that the observation of spectral symmetry relies on four critical components. Violating any of these disrupts the link between the Hamiltonian's algebraic structure and the spectrum's geometric symmetry.

1. **Correct Spin Indexing (Topology of  $J$ ):** The nuclei must be indexed (numbered) such that the  $J$ -coupling matrix exhibits the required topological invariance or balanced reflection relative to the secondary diagonal. Arbitrary indexing destroys the structure of the permutation operator  $\hat{\Pi}$ , making the generalized parity operator  $\hat{Q}$  physically meaningless for the system.
2. **Frequency Centering ( $\sum \nu_i = 0$ ):** Defining resonance frequencies relative to the spectral center of gravity is strictly necessary to render the Zeeman matrix perfectly anti-persymmetric ( $H_{ii} = -H_{jj}$ ). In the "Shell" regions, this condition ensures the exact compensation of energies ( $+\nu$  and  $-\nu$ ), converting the Zeeman anti-symmetry into the persymmetry required to resolve the conflict with the symmetric  $J$ -coupling term.
3. **Canonical Basis Sorting:** The basis functions must be rigorously ordered by  $M_z$  and, crucially, arranged to be centrosymmetric with respect to the spin inversion operator  $\hat{P}$ . This ensures that the physical operation of spin inversion maps exactly to the geometric reflection of the matrix indices ( $k \leftrightarrow D + 1 - k$ ).
4. **Correct Symmetrizing Transformation ( $\hat{U}$ ):** The unitary transition from the product basis to the symmetry-adapted basis is essential to factorize the Hamiltonian. It reveals the distinct algebraic nature of the irreducible blocks:
  - The Symmetric block commutes with  $\hat{Q}$  ( $[\mathbf{H}_{sym}, \hat{Q}] = 0$ ), implying geometric invariance.
  - The Antisymmetric block anti-commutes with  $\hat{Q}$  ( $\{\mathbf{H}_{anti}, \hat{Q}\} = 0$ ), implying topological reflection.

The theoretical explanation of spectral symmetry is the result of the synergy between these factors:

$$\text{Spectral Symmetry} = \text{Topology}(J) + \text{Centering}(\nu) + \text{Basis}(\hat{P}) + \text{Algebra}(\hat{Q}). \quad (24)$$

## 7.6 Comparison with Magnetic Equivalence ( $A_nB_n$ and $A_2X_2$ )

It is important to distinguish the  $AA'BB'$  case from systems with magnetic equivalence, such as  $A_nB_n$  or  $A_2X_2$ . In  $A_nB_n$  systems, the intra-group couplings  $J_{AA}$  and  $J_{BB}$  do not affect the transition energies (they disappear from the relevant parts of the Hamiltonian). Thus, the condition for spectral symmetry is satisfied trivially. In contrast, in  $AA'BB'$  systems,  $J_{AA'}$  and  $J_{BB'}$  actively contribute to the spectrum, and symmetry is preserved only due to the specific algebraic structure (cancellation of signs in squared differences) described above.

## 8 The General Theorem of Spectral Symmetry

Based on the preceding analysis, we can formulate the most general condition for the mirror symmetry of an NMR spectrum. We introduce the concept of **reflected frequencies** relative to the spectral center of gravity  $\nu_0 = \frac{1}{n} \sum \nu_i$ . The reflected frequency set  $\nu'$  is defined as  $\nu'_i = 2\nu_0 - \nu_i$ .

**Theorem 1** (Condition for Mirror Symmetry). *An NMR spectrum  $S(\omega)$  is mirror-symmetric with respect to its center **if and only if** the Hamiltonian with the reflected resonance frequencies,  $\hat{H}(\nu')$ , is unitarily similar to the original Hamiltonian  $\hat{H}(\nu)$ .*

$$\exists \hat{U} : \quad \hat{H}(2\nu_0 - \nu, J) = \hat{U}^\dagger \hat{H}(\nu, J) \hat{U} \quad (25)$$

Where  $\hat{U}$  is a unitary operator.

**Corollary 1.1** (Simultaneous Structural Requirement). *The condition of unitary similarity implies a strict topological constraint on the spin system. For a spectrum to be mirror-symmetric, there must exist a **single specific spin ordering** (labeling sequence  $1, \dots, N$ ) that satisfies two conditions simultaneously:*

1. **Frequency Equilibration:** *The sequence of resonance frequencies is centrosymmetric about the spectral center  $\nu_0$  (e.g.,  $\nu_i - \nu_0 = -(\nu_{N+1-i} - \nu_0)$ ).*
2. **Matrix Reflection Invariance:** *In this same ordering, the  $J$ -coupling matrix is invariant under reflection about the secondary diagonal. This invariance can be either:*
  - **Explicit (Geometric):**  $J_{ij} = J_{N+1-i, N+1-j}$  (balanced systems like  $A_nB_n$ ).
  - **Implicit (Isospectral):**  $J_{ij} \neq J_{N+1-i, N+1-j}$ , but the pairs are "balanced" such that the spectrum is isospectral under their permutation (as in  $AA'BB'$ ).

*If no such single ordering exists (i.e., the ordering required to center the frequencies disrupts the necessary  $J$ -coupling matrix symmetry, as in heteronuclear cycles like cyclooctatetraene derivatives), the spectral symmetry is broken.*

## 9 Practical Criterion for Spectral Symmetry

Based on the general theorem, we can formulate a practical criterion for verifying the mirror symmetry of an NMR spectrum without full diagonalization.

**Criterion 1** (Necessary and Sufficient Conditions). *The NMR spectrum  $S(\omega)$  is mirror-symmetric with respect to the central frequency  $\nu_0$  **if and only if** there exists a spin ordering index  $k \in \{1, \dots, N\}$ , sorted by resonance frequencies, for which the following two conditions hold simultaneously:*

## 9.1 Condition 1: Frequency Centrosymmetry

The distribution of resonance frequencies must be antisymmetric with respect to the spectral center  $\nu_0$ . For every nucleus  $k$ :

$$\nu_k - \nu_0 = -(\nu_{N+1-k} - \nu_0) \quad (26)$$

## 9.2 Condition 2: Symmetry of the $J$ -Coupling Matrix

Consider the operation of reflection about the secondary diagonal, denoted by  $\mathcal{R}$ , acting on the  $J$ -coupling matrix  $\mathbf{J}$ :

$$(\mathcal{R}\mathbf{J})_{ij} = J_{N+1-i, N+1-j} \quad (27)$$

For mirror symmetry to exist, the system must satisfy one of the following two cases:

- **Case A: Geometric Symmetry (Explicit)**

The  $J$ -coupling matrix is invariant under reflection:

$$\mathbf{J} = \mathcal{R}\mathbf{J} \iff J_{ij} = J_{N+1-i, N+1-j} \quad (28)$$

This corresponds to systems with physical geometric symmetry (e.g., AB or AX).

- **Case B: Isospectral Symmetry of Balanced Pairs (Implicit)**

The matrix changes under reflection ( $\mathbf{J} \neq \mathcal{R}\mathbf{J}$ ), but the spectrum remains invariant. This occurs when the non-matching coupling constants form **balanced pairs**  $\{J_\alpha, J_\beta\}$  that are swapped by the reflection operation:

$$J_\alpha \xrightarrow{\mathcal{R}} J_\beta, \quad J_\beta \xrightarrow{\mathcal{R}} J_\alpha \quad (\text{where } J_\alpha \neq J_\beta) \quad (29)$$

**Invariance Requirement:** The set of energy eigenvalues must be invariant under the permutation of constants within these pairs:

$$\text{Spect}(\dots, J_\alpha, J_\beta, \dots) = \text{Spect}(\dots, J_\beta, J_\alpha, \dots) \quad (30)$$

*Physical interpretation:* This implies that the characteristic polynomial of the Hamiltonian depends on these parameters in a symmetric fashion (e.g., involving only their sum  $J_\alpha + J_\beta$  and the square of their difference  $(J_\alpha - J_\beta)^2$ ), as observed in AA'BB' systems.

In systems containing large groups of chemically equivalent nuclei, e.g.,  $[A'B']_n$ , the requirement of sorting by resonance frequencies is necessary but not sufficient. Due to the permutation symmetry within equivalent groups, there exist multiple spin orderings that satisfy the frequency sorting condition. However, as matrix analysis demonstrates, the condition of  $J$ -coupling matrix symmetry is sensitive to the relative ordering of spins within these chemically equivalent groups. Therefore, for such high-order systems, the criterion is strictly defined as follows: Mirror symmetry exists if there is **at least one specific permutation** within the chemically equivalent sets that results in a symmetric  $J$ -coupling matrix.

## 10 Implications for Structure Elucidation (The Inverse Problem)

Since the criterion established above provides necessary and sufficient conditions, the experimental observation of a mirror-symmetric spectrum imposes strict constraints on the properties of the underlying Hamiltonian. This allows for the partial solution of the "inverse problem": inferring structural properties solely from spectral symmetry.

1. **Unitary Self-Similarity:** A Hamiltonian generating a symmetric spectrum is guaranteed to be unitarily similar to itself under the operation of frequency reflection. Mathematically, there exists a unitary operator  $\hat{U}$  such that:

$$\hat{H}(2\nu_0 - \nu) = \hat{U}^\dagger \hat{H}(\nu) \hat{U} \quad (31)$$

2. **Topological Constraints:** The molecular structure must admit at least one numbering of nuclei where the  $J$ -coupling matrix  $\mathbf{J}$  exhibits either explicit geometric symmetry (reflection invariance) or implicit isospectral symmetry (balanced pairs).
3. **Exclusion of Candidates:** In practical structure elucidation, the presence of a symmetric multiplet allows one to immediately reject any candidate structures (e.g., arbitrary  $ABCD$  spin systems with random couplings) that do not possess the required topological symmetry in their  $J$ -coupling network.

## 11 Conclusion

The mirror symmetry of NMR spectra is governed by the interplay between the distribution of resonance frequencies and the topology of the  $J$ -coupling network. We have established that:

1. **Necessary Condition:** The Hamiltonian must be unitarily similar to itself under the operation of frequency reflection relative to the spectral center.
2. **Practical Criterion:** This similarity is physically realized if and only if there exists a spin permutation that **simultaneously**:
  - Arranges resonance frequencies symmetrically about the center.
  - Reveals a  $J$ -coupling matrix structure that is invariant (geometrically or isospectrally) under reflection about the secondary diagonal.

Systems with full magnetic equivalence (such as  $A_n B_n$  or  $A_n X_n$ ) satisfy these conditions trivially because the symmetry-breaking intra-group couplings do not affect the spectrum. Systems like  $AA'BB'$  satisfy them via algebraic isospectrality (balanced pairs) **originating from the internal symmetry of the spin system**. However, in more complex systems where chemical equivalence exists but magnetic equivalence is violated (general structures of type  $[A'B']_n$  or complex heteronuclear cycles), the specific topological balance required for isospectrality may be absent. In such cases, the conflict between frequency equilibration and  $J$ -coupling matrix symmetry results in **asymmetric spectra**.

## References

- [1] P. L. Corio, *Structure of High-Resolution NMR Spectra*, Academic Press, New York, 1966.
- [2] J. A. Pople, W. G. Schneider, and H. J. Bernstein, *High-resolution Nuclear Magnetic Resonance*, McGraw-Hill, New York, 1959.
- [3] C. N. Banwell and H. Primas, "High-resolution nuclear magnetic resonance spectra of general three-spin systems", *Molecular Physics*, vol. 5, pp. 505, 1962.
